# Supplementary material for: Spatial Distribution and Biochemical Characterization of Serine Peptidase Inhibitors in the Venom of the Brazilian Sea Anemone Anthopleura cascaia Using Mass Spectrometry Imaging
Source: MDPI journal article supplement (doi:10.3390/md21090481), 2023-08-30

**Figure S1. SDS-PAGE analysis of soluble fraction (SL) of the venom and precipitate fraction of the venom (P).** Samples (20µL) were analysed by SDS-PAGE (12 %) and stained with Comassie brilliant blue. The venom possesses a wide variety of proteins ranging from 14 to 97kDa. **B- Trypsin Inhibition Assay.** The venom (15 µl) was preincubated for 30 min with trypsin (1:1), and afterwards substrate was added to the samples. Substrate consumption in Arbitrary Units of Fluorescence (Y axis) was read every 5 min for 35 min (X axis). In the test, the sea anemone *A. cascaia* venom; Blank (B + S); and Positive Control (E + S), were analysed. B = Buffer, S = Substrate and E = Enzyme. The venom shows the presence of inhibitor components by complete inhibition of Trypsin activity. **C- MALDI-TOF analysis of *A. cascaia*'s venom by positive mode.** The mass spectrum shows that *A. cascaia* venom is also composed by low molecular mass components ranging from m/z 3018 to 9995.7.

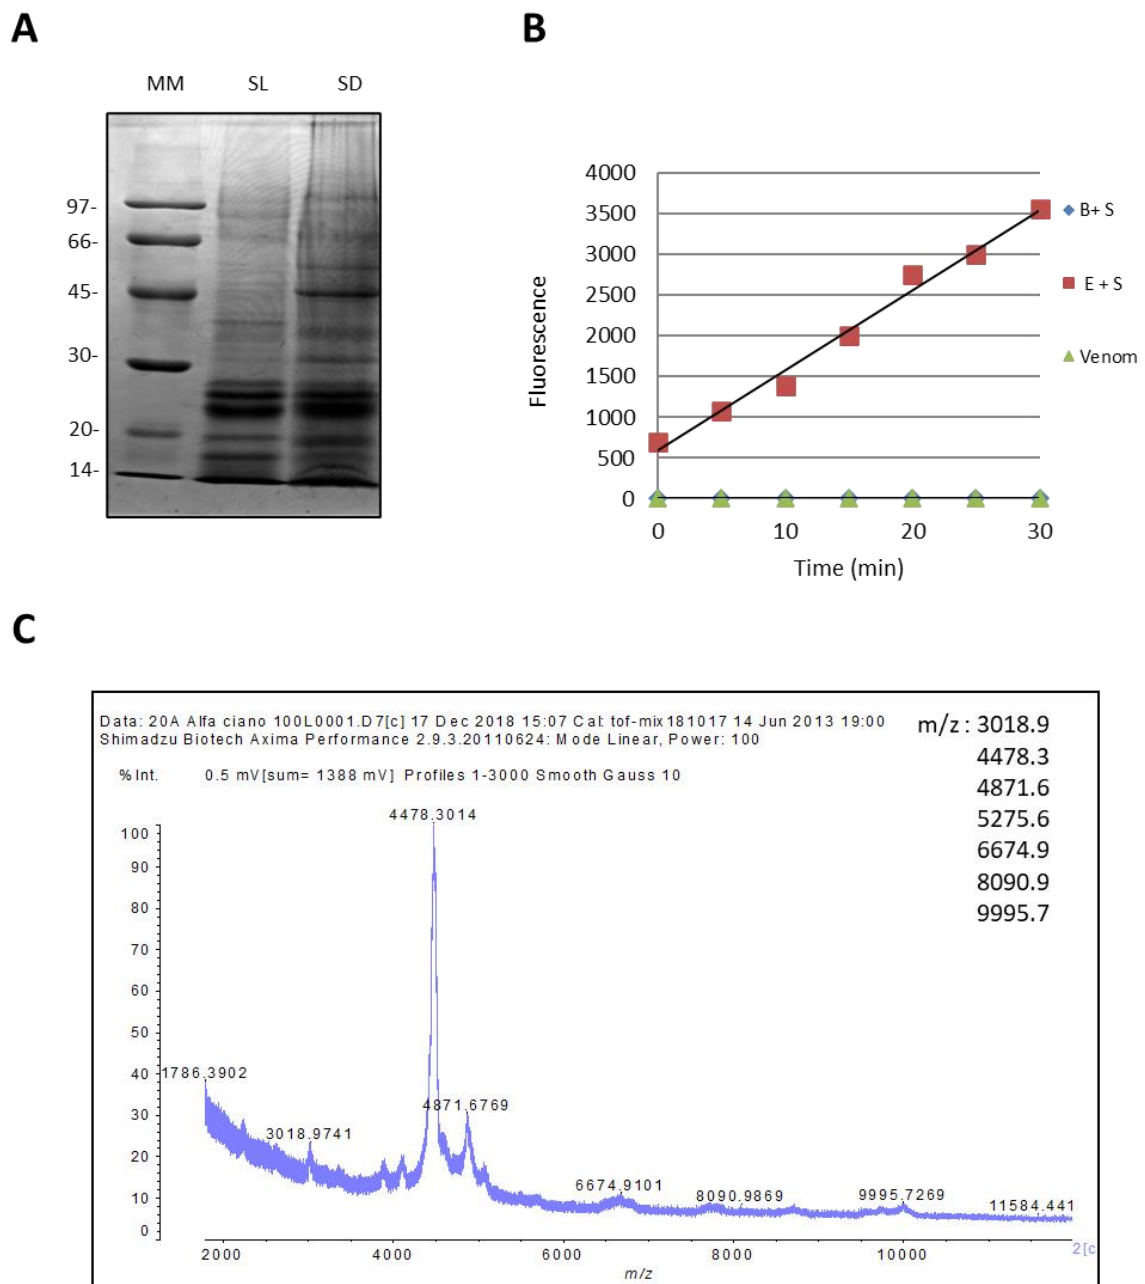

**Figure S2. Trypsin Inhibition Assay.** Fractions (5 to 15  $\mu$ l) were preincubated for 30 min with trypsin (1:1), and afterwards substrate was added to the samples. Substrate consumption in Arbitrary Units of Fluorescence (Y axis) was read every 5 min for 35 min (X axis). In the test, samples representing venom fractions from *A. cascara*; Blank (B + S); and Positive Control (E + S), were analysed. B = Buffer, S = Substrate and E = Enzyme. **A- Shows the graph and resulting table of the inhibition assay performed with fractions (F1-F6) from the venom.** F3 and F4 were the only fractions capable of inhibiting trypsin, presenting 100% (F3) and 28% (F4) of inhibition. **B- Shows the graph and resulting table of the inhibition assay performed with fractions from F3.** The subfractions F3.7 and F3.8 presented complete inhibition (100%) of the enzyme activity. **C- Shows the graph of the assay performed with fractions from F3.7.** The subfractions F3.7.5 and 3.7.6 presented 90% of inhibition of the enzymatic activity. **D- Shows the graph of the assay performed with fractions from F3.8.** A wide variety of subfractions presented inhibitory activity, however F3.8.4; F3.8.6; F3.8.8 were considered the best candidates due to the quality of isolation of peaks, that exhibited 85%; 65% and 59 % of trypsin inhibition, respectively.

**A**

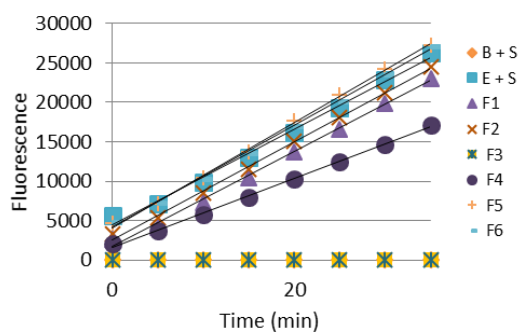

| Sample        | Enzyme activity (%) | Inhibition (%) |
|---------------|---------------------|----------------|
| Control (E+S) | 100                 | 0              |
| F1            | 99                  | 1              |
| F2            | 100                 | 0              |
| F3            | 0                   | 100            |
| F4            | 72                  | 28             |
| F5            | 100                 | 0              |
| F6            | 100                 | 0              |

**B**

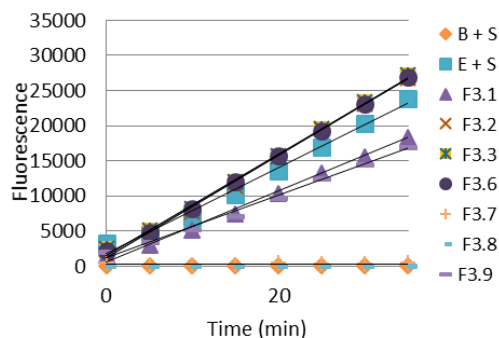

| Sample        | Enzyme activity (%) | Inhibition (%) |
|---------------|---------------------|----------------|
| Control (E+S) | 100                 | 0              |
| F3.1          | 83                  | 17             |
| F3.2          | 100                 | 0              |
| F3.3          | 100                 | 0              |
| F3.4          | 100                 | 0              |
| F3.5          | 100                 | 0              |
| F3.6          | 100                 | 0              |
| F3.7          | 0                   | 100            |
| F3.8          | 0                   | 100            |
| F3.9          | 72                  | 28             |

**C**

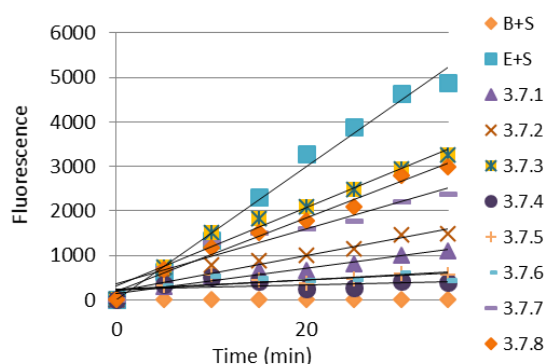

**D**

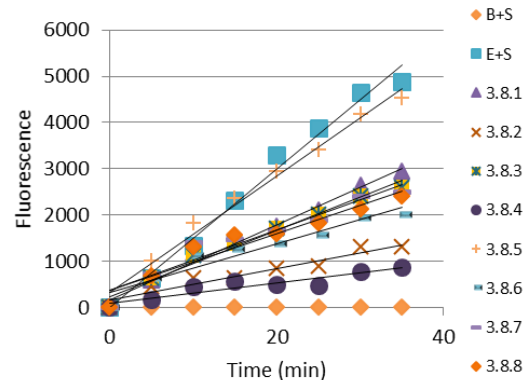

**Figure S3.** Coverage of amino acid sequence from Blastp hit PI-actitoxin-Aeq3a-like based on peptides identified by LC-MS/MS in ACPI-I isolated from *A. cascaia* venom. Supporting peptides R.YYYDESIGTC(+57.02)R.Q and R.QFIFGGC(+57.02)QGNENNFETM(+15.99)K.E are highlighted in grey color and underlined in blue. Cysteine (C) residues present +57.02 mass shift due to alkylation with iodoacetamide and Methionine (M) residues from peptides also present a mass increase of 15.99 due to oxidation. The mass spectra and the error (da) corresponding to the sequence 'YYYDESIGTC' is presented below the sequence.

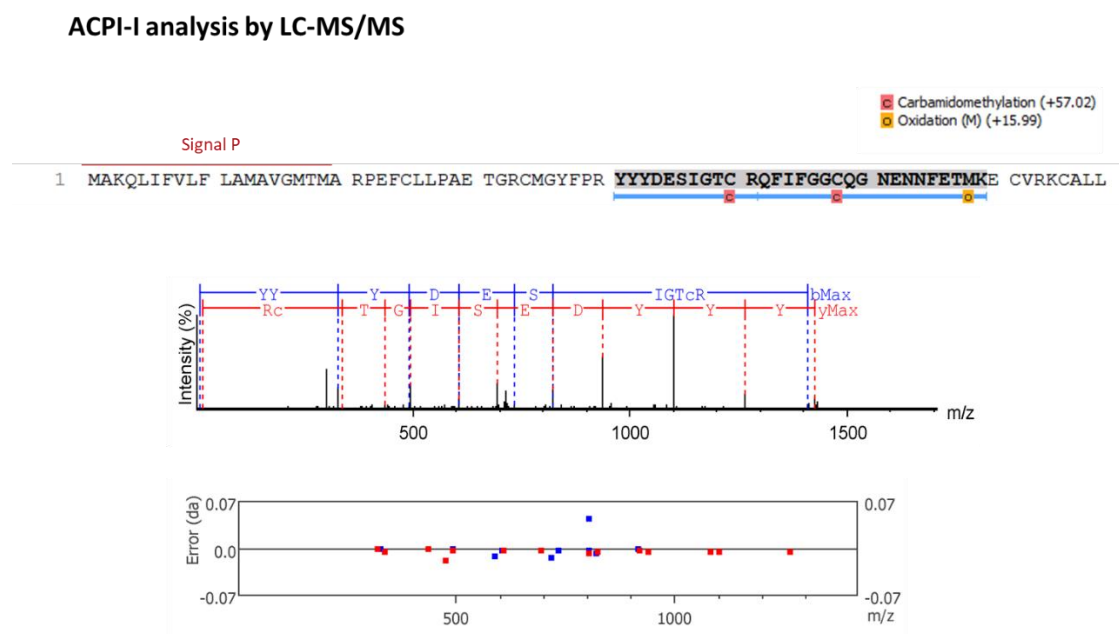

**Figure S4.** Coverage of amino acid sequence from the Blastp hit PI-actitoxin-Aeq3a-like based on peptides identified by LC-MS/MS in ACPI-II isolated from *A. cascaia* venom. Supporting peptides – R.C(+57.02)M(+15.99)GYFPR.Y, R.YYDESIGTC(+57.02)R.Q and R.QFIFGGC(+57.02)QGNENNFMETMK.E – are highlighted in grey color and underlined in blue color. Cysteine (C) residues present +57.02 mass shift due to alkylation with iodoacetamide and Methionine (M) residues also present a mass increase of 15.99 due to oxidation. The mass spectra and the error (da) corresponding to the sequence ‘YYDESIGTC’ is presented below the sequence.

### ACPI-II analysis by LC-MS/MS

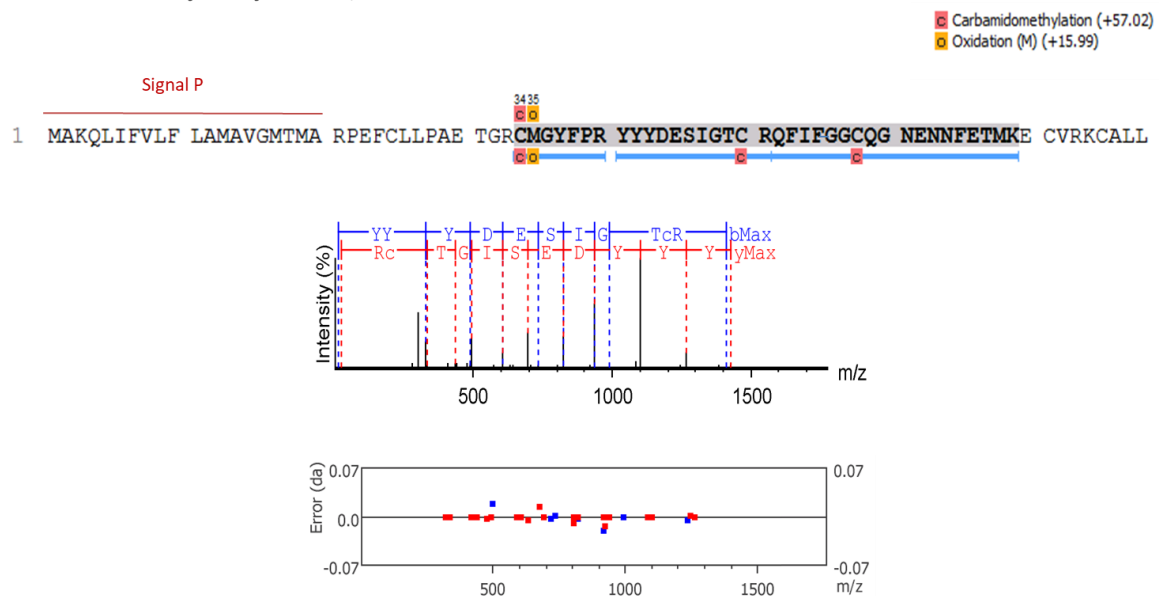

**Figure S5.** Coverage of amino acid sequence from Blastp hit PI-actitoxin-Aeq3a-like based on peptides identified by LC-MS/MS in ACPI-III isolated from *A. cascaia* venom. The supporting peptide –R.YYYDESIGTC(+57.02)R.Q – is highlighted in grey color and underlined in blue color. Cysteine (C) residues present +57.02 mass shift due to alkylation with iodoacetamide. The mass spectra and the error (da) corresponding to the sequence ‘YYYDESIGTC’ is presented below the sequence.

## ACPI-III analysis by LC-MS/MS

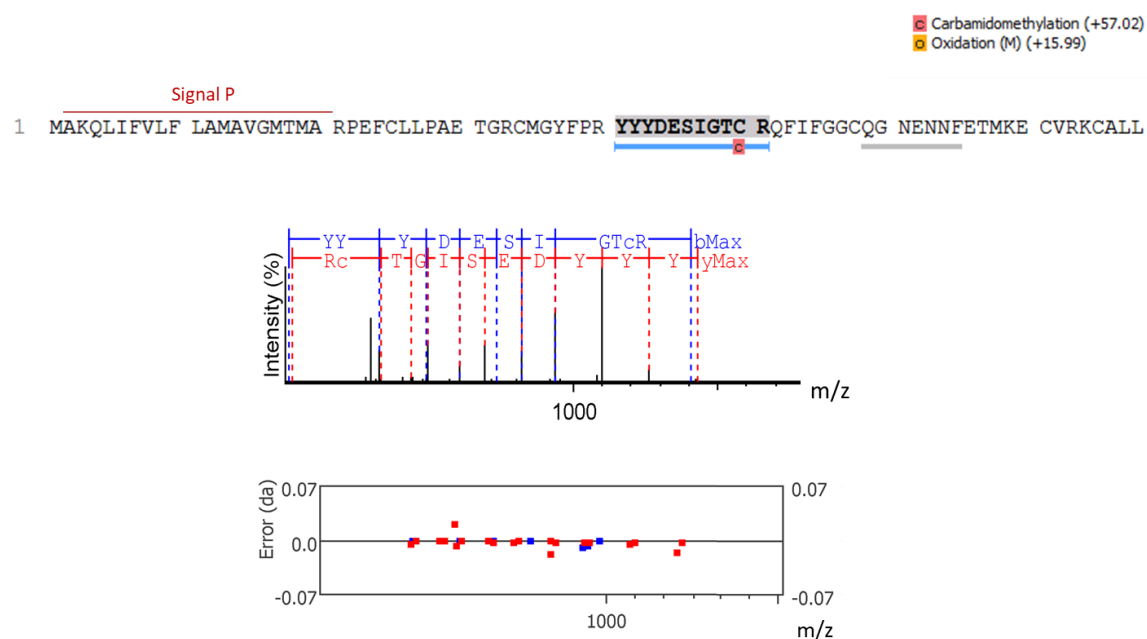

**Table S1.** List of de novo peptides identified by LC-MS/MS in each sample (ACPI-I, ACPI-II and ACPI-III). The table shows the Average Local Confidence percentage (ALC %) for each peptide identified. De novo sequences were submitted to BLASTp and searched using the non-redundant proteins database and Cnidaria taxid at NCBI platform. De novo sequences revealed that peptides from ACPI-I, ACPI-II and ACPI-III present 87%; 78% and 66% of identity to the peptides found in PI-actitoxin-Aeq3a-like from *Actinia tenebrosa*, respectively.

| Isolated peptide | De novo peptides                           | ALC (%) | E value | Per ID (%) | PI-actitoxin-Aeq3a-like from<br><i>Actinia tenebrosa</i> |
|------------------|--------------------------------------------|---------|---------|------------|----------------------------------------------------------|
| ACPI-I           | YYYDESLGHM (+15.99)ER                      | 73%     | 1.2     | 87.5       |                                                          |
| ACPI-II          | DLDM(+15.99)GYFPR                          | 75%     | 2e-13   | 77.7       |                                                          |
|                  | YYYDESLGM (+15.99) M (+15.99) M (+15.99) K | 91%     |         |            |                                                          |
|                  | QDKYGGCQGNENNFETMK                         | 89%     |         |            |                                                          |
| ACPI-III         | YYYDESLGGSC(+57.02)HK                      | 71%     | 3e-08   | 65.62      |                                                          |
|                  | GYWQNC(+57.02)QGNENNFETMK                  | 69%     |         |            |                                                          |

**Figure S6.** Mass spectra from de novo peptides identified by LC-MS/MS in ACPI-I, ACPI-II and ACPI-III isolated from *A. cascaia* venom.

**ACPI-I**

YYYDESLGHMER

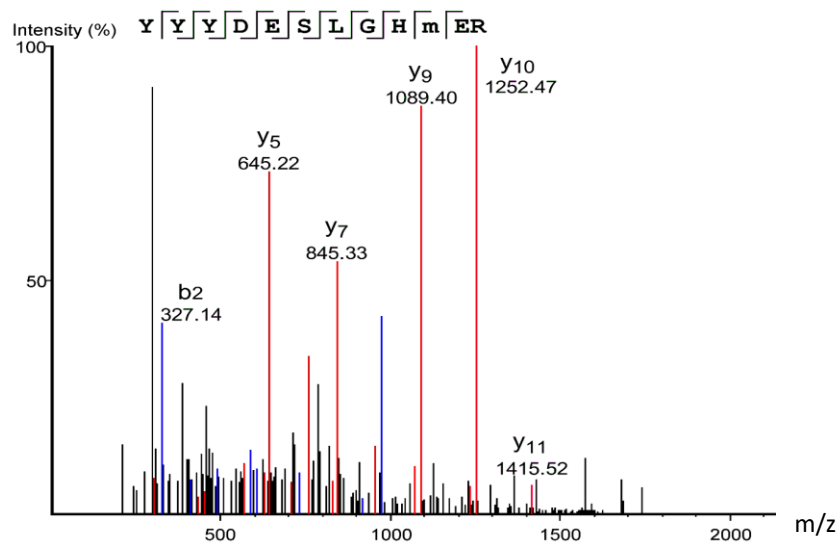

Supplementary material S6 continue in next page.

ACPI-II

DLDMGYFPR YYYDESLGMMMK QDKYGGCQG NENNFETMK

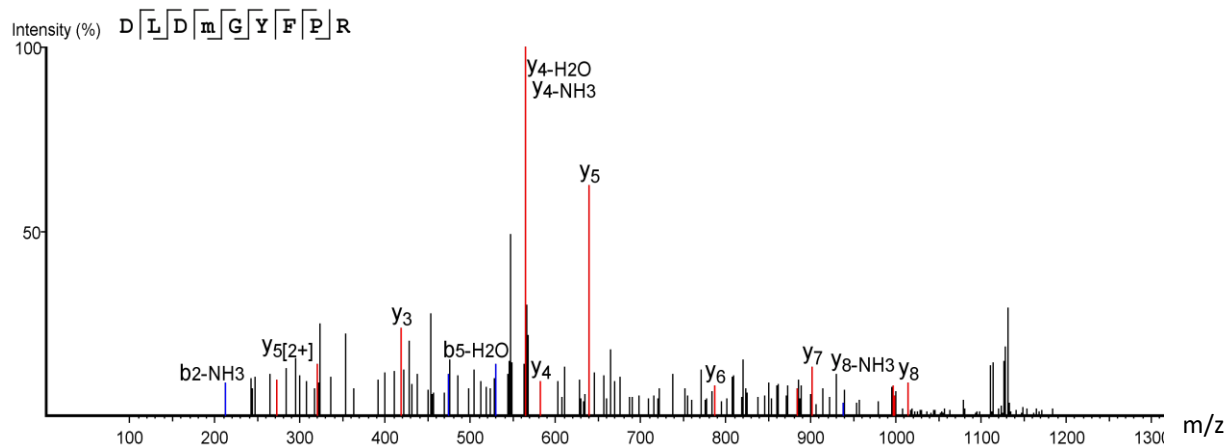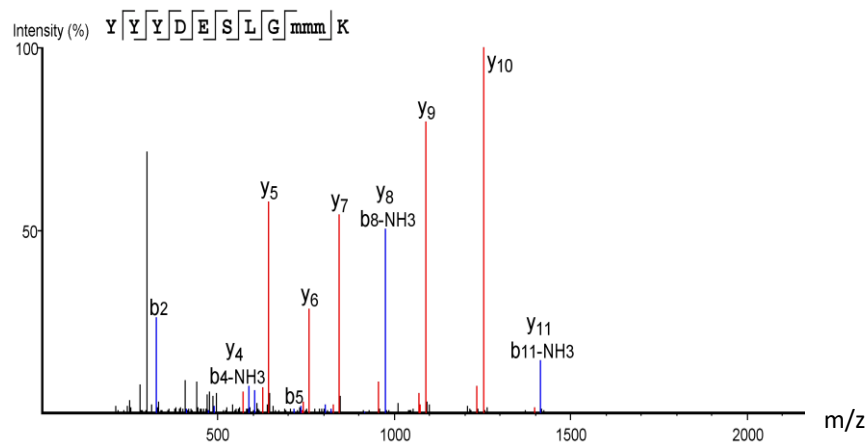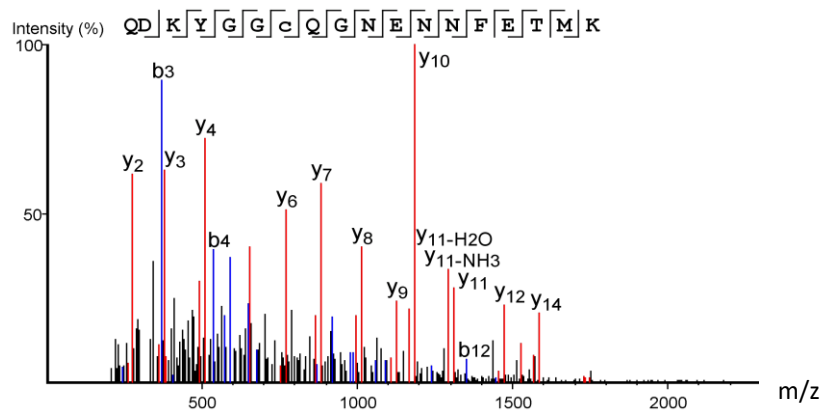

Supplementary material S6 continue in next page.

ACPI-III

YYYDESLGGSC

GYWQNCQGHK

NENNFETMK

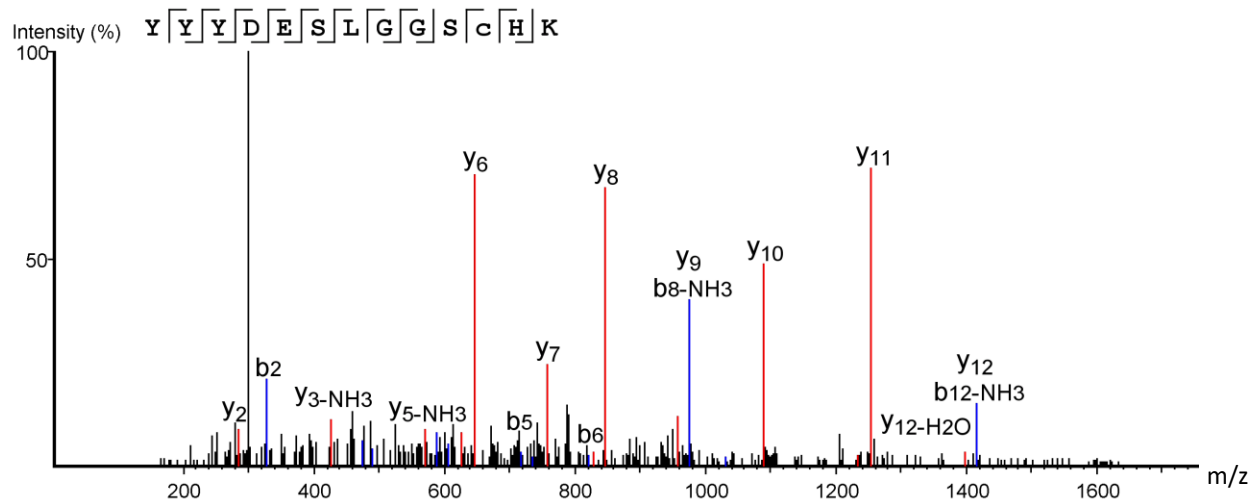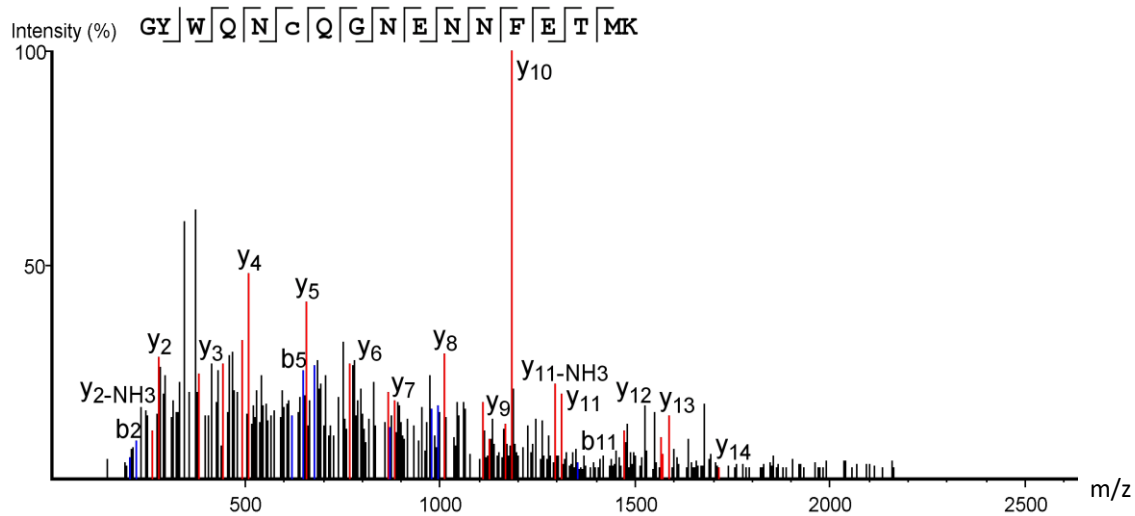

Supplement: s1 [file s1]
